# Supplementary material for: Fe–Si networks and charge/discharge-induced phase transitions in Li2FeSiO4 cathode materials
Source: Royal Society of Chemistry journal article supplement (doi:10.1039/c8cp01962b), 2018-01-01
Supplement: c8cp01962b1.pdf [file c8cp01962b1.pdf]

# Supplementary material for manuscript “Fe-Si networks and charge/discharge-induced phase transitions in $\text{Li}_2\text{FeSiO}_4$ cathode materials”

| Space Group Number 33 |         |          |         |         |
|-----------------------|---------|----------|---------|---------|
| cell                  |         | a        | b       | c       |
|                       |         | 11.03838 | 5.13042 | 6.26102 |
| Atom                  | wyckoff | x        | y       | z       |
| Li                    | 4a      | -0.0735  | 0.7953  | -0.0005 |
| Li                    | 4a      | 0.6595   | 0.6908  | 0.2461  |
| Fe                    | 4a      | 0.6674   | 0.6980  | 0.7458  |
| Si                    | 4a      | 0.4111   | 0.8081  | 0.4973  |
| O                     | 4a      | 0.5860   | 0.8693  | -0.0019 |
| O                     | 4a      | 0.5500   | 0.6915  | 0.4987  |
| O                     | 4a      | 0.3406   | 0.7082  | 0.7171  |
| O                     | 4a      | 0.3359   | 0.7098  | 0.2827  |

Tab s1. The structural information of the possible Pmnb-cycled phase. The cell is orthonormal, and the atom positions are in direct coordinates

the structural information of Pmnb-cycled phase is shown in Tab.1. Compared with the experimental Pmn21-cycled phase, the proposed Pmnb-cycled phase has the same Fe-Si network but with some cation-centered polyhedra inverted, see fig. s1. The energy of the half-delithiated Pmnb-cycled phase is also slightly lower (0.035eV/f.u.)

than the half-delithiated Pmn21-cycled phase. We found that if moving the Li Fe Si atoms (circled out in fig.s1a) across the O atoms to the right direction, the structures in (a) can transform to (b). As the two phases in fig. s1 can be very similar, it is necessary to compared with the experimental results.

The phonon calculation shows that the newly proposed Pmnb-cycled phase is stable, see fig. s2.

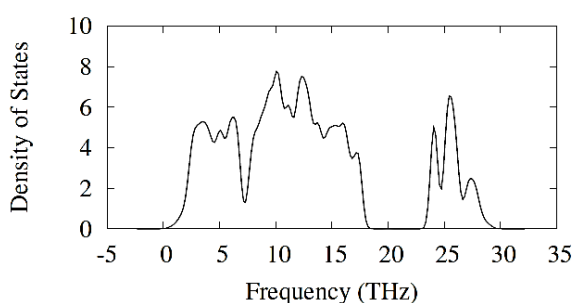

Fig s2. Phonon density of states of the possible Pmnb-cycled phase

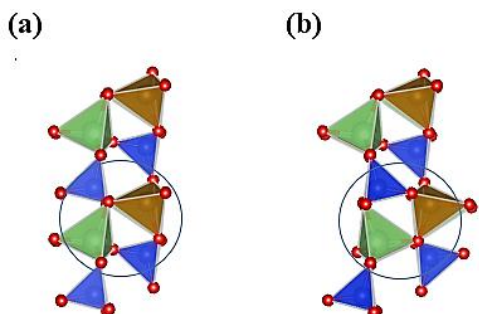

Fig s1. The half-delithiated phase of (a) Pmn21-cycled (b) Pmnb-cycled the difference between the two phases are circled out in the figure.
